# Supplementary material
Source: publisher site journal article supplement (https://www.degruyterbrill.com/publication/journal_key/CMBLE/downloadAsset/CMBLE_Guidelines%20for%20Reviewers.pdf)
Supplement: Supplementary file 1 [file CMBLE_Guidelines%20for%20Reviewers.pdf]

## **Your contribution**

We greatly appreciate the time and effort given by reviewers in evaluating papers for publication in our journal. Thanks to your contribution, Cellular & Molecular Biology Letters authors receive fast, fair and comprehensive review.

## **Our standards**

- our reviewers are kindly requested to deliver reports in 3-4 weeks
- communications are published in 6 weeks from receipt, research and review papers in 8-9 weeks, unless they have needed major revision by authors
- research articles and communications are reviewed by a minimum of two reviewers, review papers by at least three
- we pay special attention to receive unbiased, fair opinions; special policies govern allocation of reviewers to articles
- whenever submissions qualifies for publication but needs revision, reviewers are asked to give comprehensive opinion on necessary improvements

## **Welcome**

If you wish to support us as a reviewer, please contact the Managing Editor at [cmbl@cmbl.org.pl](mailto:cmbl@cmbl.org.pl).

We encourage our reviewers to use our online submission system <http://ojs.cmbl.org.pl> . To log into the system you need to use the data sent to you by Editor via email. If using the online system is not convenient for you, please contact the Editor by email.
